# Supplementary material
Source: Research Square preprint supplement (doi:10.21203/rs.3.rs-8799725/v1)
Supplement: Supplementary file 1 [file 5ad240e7fd2b450460b88585.docx]

**Questionnaire**

A) Demographic characteristics

Patient ID number:................................................

Age: ........................................ years

Gender: Male⃝ Female ⃝

B) Study group

1- Celiac patients with gluten-containing diet ⃝

2- Celiac patients with gluten-free diet ⃝

3- Control group ⃝

C) Previous disease history

Heart disease ⃝ Thyroid disease ⃝ Asthma ⃝ Diabetes ⃝ Digestive ⃝diseases

Respiratory diseases ⃝ Hypertension ⃝ Neurological diseases⃝ other diseases⃝

D) Medication history:

Yes Type of drug ………… Duration of drug use…………………..

No

E) DMFT:

Number of decayed teeth: ................................

Lost: ................................

Restored :…………..

Total: …………….

F) Microbial load of Lactobacillus acidophilus: .................................

G) Microbial load of Streptococcus mutans: .................................

H) Saliva Ph: ................................................
